# Supplementary material for: Enhancing the Implementation of a high-quality randomized trial in pregnancy
Source: Research Square preprint supplement (doi:10.21203/rs.3.rs-8287988/v1), 2026-01-12
Supplement: Supplementary file 1 [file 63835bce8b0549c1aff374d6.docx]

**Supplementary Figure 1: Study visit flowchart illustrating all procedures for participants during each visit**

Outpatient department (OPD)

+

Private clinics

Prescreening visit

2nd prenatal visit
(1st trimester)

- Fulfilled the eligibility criteria
- Showed willingness to participate and be compliant
- Signed a written consent form

Screening visit

**11- 17.5 weeks of GA**

Screening tests: 25- Hydroxyvitamin D level (25(OH) D), calcium, phosphate, magnesium, creatinine and thyroid stimulating hormone (TSH). Urine calcium test in a fasting urine spot or 24 h urine collection

25(OH) D level

>30 ng/ml excluded

<10 ng/ml excluded

10-30 ng/ml

*Except visit 4, visits coincide with routine prenatal visits

GA: Gestational Age

Eligible and enrolled

25(OH)D 10-30 ng/ml

- Maternal weight, height and blood pressure were measured
- Participants filled out the questionnaire on maternal and related paternal information.
- Pregnant women were randomized to one of two vitamin D doses

Visit 1 (2nd Trimester)

**15-18 weeks of GA**

Research assistants made phone calls between the first and second visits, as well as between the second and third visits, every two weeks to remind participants to take their study pills and to check for any adverse events

- Maternal weight, blood pressure, health and diet assessment
- Adverse events (if any) were recorded
- Pill counts assessed compliance to trial medication
- Blood and urine tests were carried out

Visit 2 (3rd Trimester)

**27-32 weeks of GA**

On the first day postpartum:

- Maternal data collected: weight, blood pressure, health status, and diet assessment; delivery details: mode and complications; neonatal measurements.
- Maternal and cord blood collected for 25(OH)D levels and genetic analyses (vitamin D gene polymorphisms and RNA expression).
- Placental samples collected and stored at −80°C.

Visit 3 (Delivery)

**37-41 weeks of GA**

Visit 4

1 month postpartum neonatal Bone mineral density (BMD)

During first month post-partum:

- Infant anthropometric and feeding information documented.
- Infant bone mineral content (BMC) measured via dual-energy X-ray absorptiometry (DXA) scan by a certified technician at AUBMC.

**
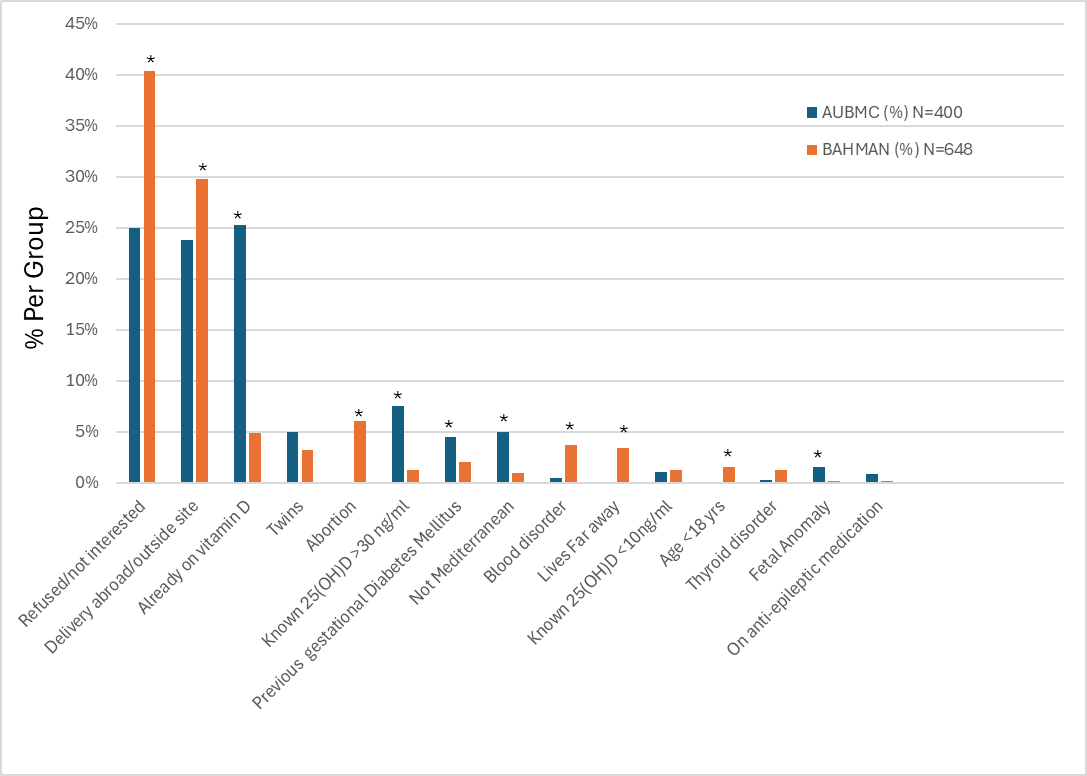
Supplementary Figure 2: Reasons for non-participation among 1,048 Study pregnant women at the pre-screening visit by study site**

**P-value=0.0001**

*indicates p<0.05 statistically significant difference between study sites.

25OH)D: 25-hydroxyVitamin D

**Supplementary Table 1. Social, reproductive, and lifestyle characteristics of randomized participants at AUBMC vs. Bahman**

|  | | **Overall**  **(N=330) N (%)** | | | **AUBMC**  **(N=154) N (%)** | **Bahman (N=176) N (%)** | | | **P-Value*** |
| --- | --- | --- | --- | --- | --- | --- | --- | --- | --- |
| **Social Characteristics** | | | | | | | | | |
| Age (years) |  | 29.5 ± 4.9 | | | 30.6 ± 4.5 | 28.6 ± 5 | | | 0.000 |
| Education | Below High School | | 31 (9.4) | 1 (0.6)* | | | 30 (17)* | 0.000 | |
| High School | 49 (14.8) | | | 17 (11) | 32 (18.2) | |
| College | 250 (75.8) | | | 136 (88.3)* | 114 (64.8)* | |
| Spouse Education | Below High School | 60 (18.2) | | | 2 (1.3) | 58 (33) | | | 0.000 |
| High School | 58 (17.6) | | | 18 (11.8) | 40 (22.7) | | |
| College | 212 (64.2) | | | 134 (87) | 78 (44.3) | | |
| Occupation | No | 179 (54.2) | | | 51 (33.1) | 128 (72.7) | | | 0.000 |
| Yes | 151 (45.8) | | | 103 (66.9) | 48 (27.3) | | |
| **Reproductive Characteristics** | | | | | | | | | |
| Gestational Age (weeks) |  | 16.6 ± 1.2 | | | 16.2 ± 1 | 16.9 ± 1.1 | | | 0.000 |
| Parity | Nulliparous | 132 (40) | | | 77 (50)* | 55 (31.3)* | | | 0.000 |
| Primiparous | 104 (31.5) | | | 54 (35.1) | 50 (28.4) | | |
| Multiparous | 94 (28.5) | | | 23 (14.9)* | 71 (40.3)* | | |
| Gravidity | Primigravida | 115 (34.8) | | | 64 (41.6)* | 51 (29)* | | | 0.017 |
| Multigravida | 215 (65.2) | | | 90 (58.4)* | 125 (71)* | | |
| Previous Abortion | Yes | 102 (30.9) | | | 47 (30.5) | 55 (31.3) | | | 0.886 |
| **Lifestyle** | | | | | | | | | |
| BMI (kg/m2) |  | 25.1 ± 4.1 | | | 24.6 ± 3.9 | 25.4 ± 4.2 | | | 0.089 |
| Active Smoker | No | 290 (87.9) | | | 146 (94.8) | 144 (81.8) | | | 0.000 |
| Yes | 40 (12.1) | | | 8 (5.2) | 32 (18.2) | | |
| Passive Smoker | No | 117 (35.6) | | | 78 (50.6) | 39 (22.2) | | | 0.000 |
| Yes | 212 (64.4) | | | 75 (48.7) | 137 (77.8) | | |
| Spouse Smoker | No | 142 (43.2) | | | 87 (56.5) | 55 (31.3) | | | 0.000 |
| Yes | 187 (56.8) | | | 66 (42.9) | 121 (69.3) | | |
| Exercise during pregnancy | No | 292 (88.5) | | | 135 (87.7) | 157 (89.2) | | | 0.661 |
| Yes | 38 (11.5) | | | 19 (12.3) | 19 (10.8) | | |
| Exercise before pregnancy | No | 203 (61.5) | | | 96 (62.3) | 107 (60.8) | | | 0.774 |
| Yes | 127 (38.5) | | | 58 (37.7) | 69 (39.2) | | |
| Veiling | No | 133 (40.3) | | | 110 (71.4) | 23 (13.1) | | | 0.000 |
| Yes | 197 (59.7) | | | 44 (28.6) | 153 (86.9) | | |

Independent t-test and Chi-Square test comparing randomized subjects by center (P<0.05)

**Supplementary Table 2.A. Adverse events (AEs) reported by trial arm and between study visits**

|  | | High Dose (2857 IU/day)  (N= 154, 49.5%) | Low Dose (715 IU/day)  (N= 157, 50.5%) | P-value |
| --- | --- | --- | --- | --- |
| AEs between Visit 1 and Visit 2 | No | 122 (79.2%) | 118 (75.2%) | 0.394 |
| Yes | 32 (20.8%) | 39 (24.8%) |
| AEs between Visit 2 and Visit 3 | No | 133 (90.5%) | 129 (87.2%) | 0.367 |
| Yes | 14 (9.5%) | 19 (12.8%) |

Independent t-test and Chi-Square test comparing randomized subjects by center (P<0.05)

**Supplementary Table 2.B. Serious adverse events (SAEs) reported between 2015-2018 in the current preg D trial and at AUBMC overall**

| Reported SAEs  (2015-2018) | Preg D trial  (N of normal admission= 330) | Data of (NCPNN) at AUBMC  (N of normal admission= 5333) |
| --- | --- | --- |
| Preterm/NICU | 11 (3.3%) | 427 (8%) |
| Gastrointestinal Infection | 1 (0.3%)* | NA |
| Preterm Contractions | 3 (0.9 %)* | NA |
| Placenta Previa | 1 (0.3%)* | 7 (0.1%) |
| Congenital Anomaly | 1 (0.3%) | 198 (3.7%) |
| Urinary Tract Infections | 2 (0.6%) | 265 (5%) |
| Low/ High Blood Pressure | 2 (0.6%) | 114 (2.1%) |
| PROM/ PPROMa | 2 (0.6%) | 60 (1.1%) |
| IUFDb | 3 (0.9%)* | 52 (0.9%) |
| NICU/ Respiratory Distress | 4 (1.2%) | 122 (2.3%) |
| Placental Abruption/Low APGAR | 1 (0.3%) | 26 (0.5%) |
| Total | 31 (9.4%) | 1888 (35.4%) |

a Premature Rupture of Membranes/ Preterm Premature Rupture of Membranes

b Intrauterine Fetal Death

Chi square test comparing SAEs in PregD trial to those reported in NCPNN (National Collaborative Perinatal Neonatal Network) at AUBMC

*Indicates significance: Each subscript letter denotes a subset of GROUP categories whose column proportions do not differ significantly from each other at the .05 level.

Note: The similarity in serious adverse events between the study population and the general population supports the generalizability of the results to the broader population within the domain of external validity.

**Supplementary Table 3. Social, reproductive, and lifestyle characteristics of completers vs. dropouts**

| Total Randomized (N=330) | | | | | | |
| --- | --- | --- | --- | --- | --- | --- |
|  | | **Completed**  **(N=292, 88.5%)** | | **DROPPED OUT**  **(N=38, 11.5%)** | |  |
|  | **N (%)** |  | **N (%)** | **P-value** |
| Social Characteristics | | | | | | |
| Age (years) (Mean ±SD) | |  | 29 ± (4.9) |  | 28.1 ± (5.2) | 0.276 |
| Center | AUBMC |  | 128 (43.8) |  | 26 (68.4) | 0.004 |
| Bahman |  | 164 (56.2) |  | 12 (31.6) |
| Education | Below High School |  | 26 (8.9) |  | 5 (9.4) | 0.516 |
|  | High School |  | 42 (14.4) |  | 7 (18.4) |
|  | College |  | 224 (76.7) |  | 26 (68.4) |
| Spouse Education | Below High School |  | 56 (19.2) |  | 4 (10.8) |  |
| High School |  | 52 (17.8) |  | 6 (16.2) | 0.403 |
|  | College |  | 184 (6) |  | 27 (73) |  |
| Occupation (Employed) | No |  | 156 (53.4) |  | 23 (60.5) | 0.408 |
| Yes |  | 136 (46.6) |  | 15 (39.5) |
| Reproductive Characteristics | | | | | | |
| Parity | Nulliparous |  | 115 (39.4) |  | 17 (44.7) | 0.341 |
| Primiparous |  | 90 (30.8) |  | 14 (36.8) |
| Multiparous |  | 87 (29.8) |  | 7 (18.4) |
| Gravidity | Nulligravida |  | v 0 (0) |  | 0 (0) | 0.525 |
| Primigravida |  | 100 (34.2) |  | 15 (39.5) |
| Multigravida |  | 192 (65.8) |  | 23 (60.5) |
| Previous Abortion | No |  | 199 (68.2) |  | 29 (76.3) | 0.306 |
| Yes |  | 93 (31.8) |  | 9 (23.7) |
| Lifestyle | | | | | | |
| BMI (kg/m2) (Mean ±SD) | |  | 24.96 ± (4.05) |  | 24.21 ± (4.91) | 0.481 |
| Active Smoker | No |  | 259 (88.7) |  | 32 (84.2) | 0.42 |
| Yes |  | 33 (11.3) |  | 6 (15.8) |
| Have you ever smoked | No |  | 178 (61) |  | 23 (60.5) | 0.959 |
| Yes |  | 114 (39) |  | 15 (39.5) |
| Do you drink alcohol? | No |  | 291 (99.7) |  | 38 (100) | 0.718 |
| Yes |  | 1 (0.3) |  | 0 (0) |
| Did you ever drink alcohol? | No |  | 258 (88.4) |  | 32 (84.2) | 0.461 |
| Yes |  | 34 (11.6) |  | 6 (15.8) |
| Do you Exercise? | No |  | 259 (88.7) |  | 34 (89.5) | 0.887 |
| Yes |  | 33 (11.3) |  | 4 (10.5) |
| Did you Exercise? | No |  | 178 (61) |  | 24 (63.2) | 0.794 |
| Yes |  | 114 (39) |  | 14 (36.8) |
| Veiling | No |  | 115 (39.4) |  | 18 (47.4) | 0.345 |
| Yes |  | 177 (60.6) |  | 20 (52.6) |

Independent t-test and Chi-Square test comparing randomized subjects by center (P<0.05)

Note: The similarity in characteristics preserves internal validity, ensuring the reliability of the results within the domain of internal validity.

**Supplementary Table 4. Social, reproductive, and lifestyle characteristics of high dose vs. low dose groups**

| Total Randomized (N=330) | | | | | | | | | | |
| --- | --- | --- | --- | --- | --- | --- | --- | --- | --- | --- |
|  | | | **High Dose (2857 IU/day)**  **(N= 165, 50%)** | | | | | **Low Dose (715 IU/day)**  **(N=165, 50%)** | |  |
|  | | **N (%)** | | |  | **N (%)** | **P-value** |
| Social Characteristics | | | | | | | | | | |
| Age (years) (Mean ±SD) | | |  | | 29.2 ± (4.8) | | |  | 29.9 ± (5) | 0.238 |
| Center | AUBMC |  | | | 77 (46.7) | | |  | 77 (46.7) | 1 |
| Bahman |  | | | 88 (53.3) | | |  | 88 (53.3) |
| Education | Below High School |  | | | 15 (9.1) | | |  | 16 (9.7) | 0.555 |
|  | High School |  | | | 28 (17) | | |  | 21 (12.7) |
|  | College |  | | | 122 (73.9) | | |  | 128 (77.6) |
| Spouse Education | Below High School |  | | | 24 (14.6) | | |  | 36 (21.8) |  |
| High School |  | | | 33 (20.1) | | |  | 25 (15.2) | 0.170 |
|  | College |  | | | 107 (65.2) | | |  | 104 (63) |  |
| Occupation (Employed) | No |  | | | 92 (55.8) | | |  | 87 (52.7) | 0.581 |
| Yes |  | | | 73 (44.2) | | |  | 78 (47.3) |
| Reproductive Characteristics | | | | | | | | | | |
| Parity | Nulliparous | | |  | | 74 (44.8) |  | | 58 (35.2) | 0.187 |
| Primiparous | | |  | | 49 (29.7) |  | | 55 (33.3) |
| Multiparous | | |  | | 42 (25.5) |  | | 52 (31.5) |
| Gravidity | Nulligravida | | |  | |  |  | | 0 (0) | 0.05 |
| Primigravida | | |  | | 66 (40) |  | | 49 (29.7) |
| Multigravida | | |  | | 99 (60) |  | | 116 (70.3) |
| Previous Abortion | No | | |  | | 120 (72.7) |  | | 108 (65.5) | 0.153 |
| Yes | | |  | | 45 (27.3) |  | | 57 (34.5) |
| Lifestyle | | | | | | | | | | |
| BMI (kg/m2) (Mean ±SD) | | |  | | 24.5 ± (3.8) | | |  | 25.6 ± (4.4) | 0.019 |
| Active Smoker | No | | |  | | 146 (88.5) |  | | 145 (87.9) | 0.865 |
| Yes | | |  | | 19 (11.5) |  | | 20 (12.1) |
| Have you ever smoked | No | | |  | | 109 (66.1) |  | | 92 (55.8) | 0.055 |
| Yes | | |  | | 56 (33.9) |  | | 73 (44.2) |
| Do you drink alcohol? | No | | |  | | 165 (100) |  | | 164 (99.4) | 0.317 |
| Yes | | |  | |  |  | | 1 (0.6) |
| Did you ever drink alcohol? | No | | |  | | 144 (87.3) |  | | 146 (88.5) | 0.736 |
| Yes | | |  | | 21 (12.7) |  | | 19 (11.5) |
| Do you Exercise? | No | | |  | | 148 (89.7) |  | | 145 (87.9) | 0.601 |
| Yes | | |  | | 17 (10.3) |  | | 20 (12.1) |
| Did you Exercise? | No | | |  | | 97 (58.8) |  | | 105 (63.6) | 0.366 |
| Yes | | |  | | 68 (41.2) |  | | 60 (36.4) |
| Veiling | No | | |  | | 67 (40.6) |  | | 66 (40) | 0.911 |
| Yes | | |  | | 98 (59.4) |  | | 99 (60) |

Independent t-test and Chi-Square test comparing randomized subjects by center (P<0.05)

Note: The similarity between arms preserves internal validity, reflecting that the randomization process was conducted correctly.
